## Review

# Bacterial Programmed Cell Death and Multicellular Behavior in Bacteria

Hanna Engelberg-Kulka\*, Shahar Amitai, Ilana Kolodkin-Gal, Ronen Hazan

Traditionally, programmed cell death (PCD) is associated with eukaryotic multicellular organisms. However, recently, PCD systems have also been observed in bacteria. Here we review recent research on two kinds of genetic programs that promote bacterial cell death. The first is mediated by *mazEF*, a toxin–antitoxin module found in the chromosomes of many kinds of bacteria, and mainly studied in *Escherichia coli*. The second program is found in *Bacillus subtilis*, in which the *skf* and *sdp* operons mediate the death of a subpopulation of sporulating bacterial cells. We relate these two bacterial PCD systems to the ways in which bacterial populations resemble multicellular organisms.

## Introduction

“Programmed cell death” (PCD) refers to any form of cell death mediated by an intracellular death program. PCD is classically known as apoptosis [1], a term that originally defined the morphological changes that characterize cell death. Over the last decade, apoptosis was elaborated in metazoans [reviewed in [2–4]] and is more specifically defined as a pathway that permits animals to eliminate damaged or excess cells efficiently while preserving metabolic resources and avoiding an immune response. However, apoptosis is not the only cell-death program. For example, plants both maintain cell number homeostasis and initiate cell death as part of a wound response with no constituents of the metazoan apoptotic program [5]. Also, metazoans eliminate damaged or excess cells through necrosis and autophagy, both programmed genetically [6–8]. The consequences of these forms of cell death differ importantly from those of apoptosis [6–8]. PCD has also been observed in unicellular eukaryotes [9–12] and even in bacteria [13–21].

Here we focus on two genetic programs that initiate cell death in bacterial cultures. The first is mediated by the toxin–antitoxin module (*mazEF*) located in many bacterial chromosomes and mainly studied in *Escherichia coli*. The second causes death of a subpopulation in sporulating cultures of the bacterium *Bacillus subtilis*. These systems suggest a multicellular-like character of bacterial populations, an important emerging concept in microbial research.

## Toxin–Antitoxin Modules in Bacteria

One of the best-studied forms of death in bacteria is mediated through specific genetic modules called “addiction modules” or toxin–antitoxin systems. Each consists of a pair of genes that specify two components: a stable toxin and an unstable antitoxin that interferes with the lethal action of the toxin. Found first in *E. coli* on low copy number plasmids, they are responsible for what is called the postsegregational killing

effect. When bacteria lose these plasmid(s) (or other extrachromosomal elements), the cured cells are selectively killed because the unstable antitoxin is degraded faster than is the more stable toxin (reviewed in [14,16,20,22–25]). The cells are “addicted” to the short-lived product, because its de novo synthesis is essential for cell survival. Thus, “addiction modules” were implicated in maintaining the stability of extrachromosomal elements.

Toxin–antitoxin systems, some of which are homologous to these extrachromosomal “addiction modules,” also occur in the chromosomes of many bacteria [26–29]. *E. coli* has several pairs of such genes, including *mazEF* [13,30–32], *chpBIK* [31,33], *relBE* [34–36], *yefM-yoeB* [37–39], *dinJ-yafQ* [16], and *ecnA-ecnB* [24]. The most-studied among these, *mazEF* [30,31], is regulatable and responsible for bacterial PCD [13]. Another toxin–antitoxin module that has been studied extensively is *relBE* (reviewed in [24]). Both *relBE* and *mazEF* have the typical toxin–antitoxin genetic organization with an unstable antitoxin (reviewed in [24,32]). However, they are nonhomologous and differ in their structure and mode of action. Their differences were recently reviewed elsewhere [32]. Here we focus on the *mazEF* system and on its relation to programmed cell death.

## *E. coli mazEF* Is a Stress-Induced “Suicide Module” That Triggers Cell Death

The genetic module *mazEF* consists of two adjacent genes, *mazE* and *mazF*, located downstream from the *relA* gene [30,31]. *mazF* encodes a stable toxin, MazF, while *mazE* encodes a labile antitoxin, MazE, degraded in vivo by the ATP-dependent ClpPA serine protease [13]. MazE and MazF interact [13,40]. MazE and MazF are coexpressed and *mazEF* is negatively autoregulated at the level of transcription by the

**Editor:** Susan Rosenberg, Baylor College of Medicine, United States of America

**Citation:** Engelberg-Kulka H, Amitai S, Kolodkin-Gal I, Hazan R (2006) Bacterial programmed cell death and multicellular behavior in bacteria. *PLoS Genet* 2(10): e135. DOI: 10.1371/journal.pgen.0020135

**DOI:** 10.1371/journal.pgen.0020135

**Copyright:** © 2006 Engelberg-Kulka et al. This is an open-access article distributed under the terms of the Creative Commons Attribution License, which permits unrestricted use, distribution, and reproduction in any medium, provided the original author and source are credited.

**Abbreviations:** PCD, programmed cell death; TLD, thymine-less death

Hanna Engelberg-Kulka, Shahar Amitai, and Ilana Kolodkin-Gal are at the Department of Molecular Biology, The Hebrew University–Hadassah Medical School, Jerusalem, Israel. Ronen Hazan is at the Department of Surgery, Massachusetts General Hospital, Harvard Medical School, Boston, Massachusetts, United States of America, and was previously at the Department of Molecular Biology, The Hebrew University–Hadassah Medical School, Jerusalem, Israel.

\* To whom correspondence should be addressed. E-mail: hanita@cc.huji.ac.il

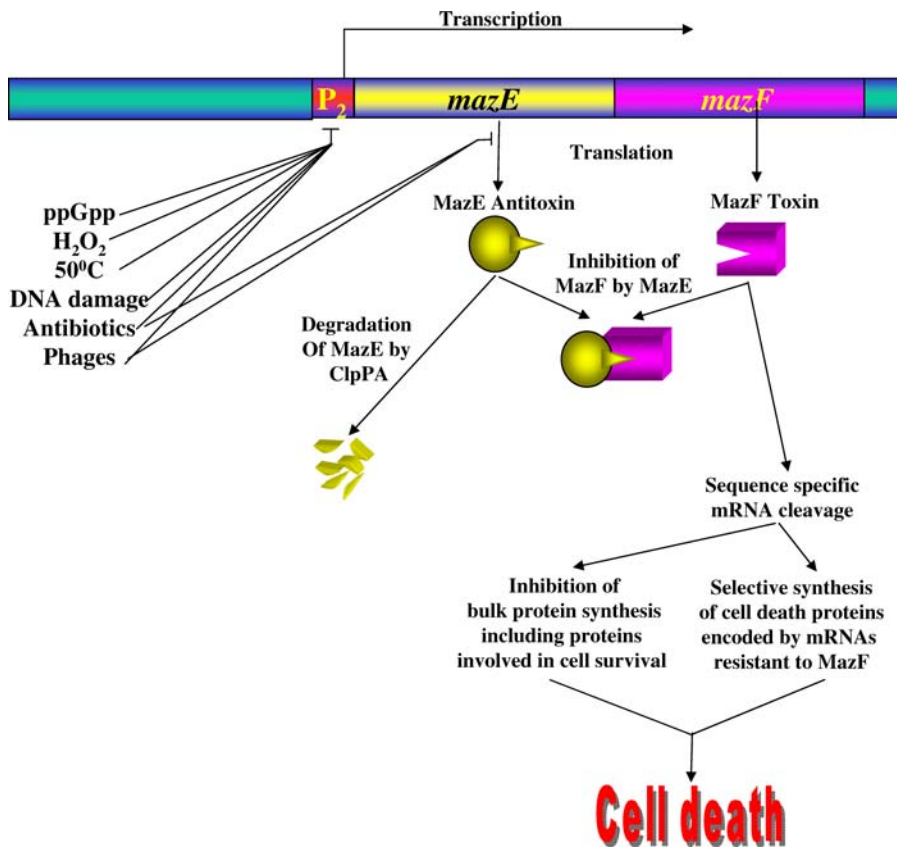

DOI: 10.1371/journal.pgen.0020135.g001

**Figure 1.** A Schematic Representation of *E. coli mazEF*-Mediated Cell Death  
For details, see the text.

combined action of both MazE and MazF proteins on the *mazEF* promoter P<sub>2</sub> [41]. Unlike extrachromosomal toxin-antitoxin systems, which are triggered through the loss of the plasmid from the bacterial cell, this system is activated by several stressful conditions that prevent the expression of *mazEF*, and thereby MazE synthesis, and thus trigger cell death. These conditions include: i) extreme amino acid starvation leading to the production of the starvation-signaling molecule ppGpp [13,42]; ii) inhibition of transcription and/or translation by antibiotics including rifampicin, chloramphenicol, and spectinomycin [43]; iii) Doc protein, a general inhibitor of translation which is the toxic product of the “addiction module” *phd-doc* of the plasmid prophage P1. The postsegregational killing effect of P1 *phd-doc* requires the presence of the *E. coli mazEF* system [44]; iv) DNA damage caused by thymine starvation [45] as well as by mitomycin C, nalidixic acid, and UV irradiation [46]; and v) oxidative stress (H<sub>2</sub>O<sub>2</sub>) [46]. Most of the antibiotics and stressful conditions that were used in these studies are well-known to induce bacterial cell death [47–50]. Thus, bacterial cell death results from stressful conditions that trigger the action of the *mazEF* module.

The effect on PCD of thymine starvation deserves special attention. In 1954, Cohen and Barner discovered that a thymine auxotrophic mutant (*thyA*) of *E. coli* undergoes cell death in response to thymine starvation [51]. This phenomenon, called thymine-less death (TLD), is observed

widely in prokaryotes and eukaryotes (reviewed in [48]). Generally, starvation of bacteria for other growth factors is bacteriostatic; TLD uniquely kills. The molecular mechanism of TLD was not understood in any organism until recently with the discovery that in *E. coli* thymine starvation triggers *mazEF*-mediated cell death [45]. This old enigma is now understood in *E. coli* as follows. Thymine starvation provokes DNA damage involving a unique breaking/twisting of the chromosome into a configuration that defies all the repair/protective mechanisms [48, 52]. Such serious DNA damage reduces transcription from the *mazEF* P<sub>2</sub> promoter drastically [45]. This should activate the death program [45].

Thus, *E. coli mazEF* is a stress-induced “suicide module” that activates when a stressful condition interrupts the expression of MazE by preventing its transcription and/or its translation. This leaves MazF unimpeded to exert its toxic effect and cause cell death (Figure 1).

### The Induction of *E. coli mazF*-Mediated Cell Death: A Point of No Return

Some debate has surrounded the idea that toxin-antitoxin systems cause PCD rather than bacteriostatic effects. Gerdes and colleagues reported [53] that the toxic effect obtained by an ectopic overproduction of MazF can be reversed by the action of the antitoxin MazE ectopically overexpressed at a later time, and suggested that rather than inducing cell death, *mazF* induces a state of reversible bacteriostasis [53].

A.

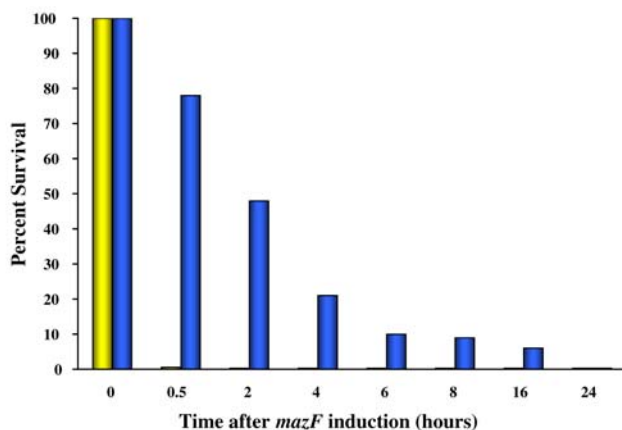

B.

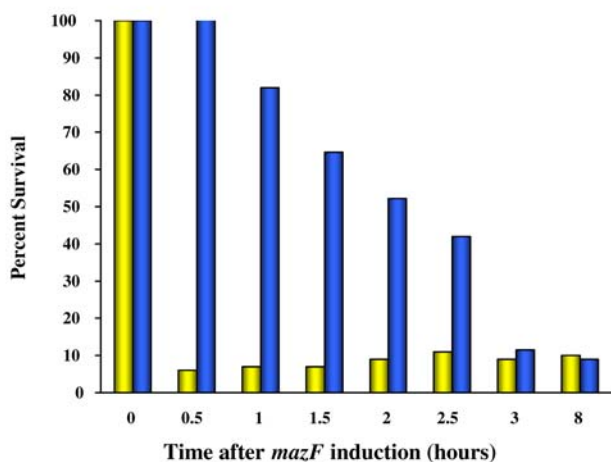

DOI: 10.1371/journal.pgen.0020135.g002

**Figure 2.** A “Point of No Return” in *E. coli* after the Induction of the (A) Plasmid Borne or (B) Chromosomally Borne *E. coli mazF* Gene

(A) *E. coli* cells growing in minimal medium were cotransformed with two plasmids, one carrying *mazE* and the other one carrying *mazF*, each regulated by different promoters: *mazF* can be induced by arabinose and repressed by glucose, and *mazE* can be induced by IPTG. At time zero, *mazF* expression was induced by the addition of arabinose. Samples of the induced culture were withdrawn at various time points and spread on plates containing glucose and IPTG (shown in blue on the graph) or glucose without IPTG (shown in yellow on the graph). Based on data in [54].

(B) *E. coli* cells growing in minimal medium were transformed with a single plasmid-carrying *mazE* that can be induced by IPTG. At the logarithmic phase, stress was induced by the addition of a transcription inhibitor. After the cells were incubated at 37 °C for a short period of time, the transcription inhibitor was removed. Samples of the induced culture were withdrawn at various time points and spread on plates containing IPTG (shown in blue on the graph) or without IPTG (shown in yellow on the graph). The percentage of survivors was calculated by comparing the number of colony forming units (CFUs) of the *MazF*-induced culture to the number of CFUs of the uninduced culture at time zero. Based on data in [55].

However, using a similar ectopic overexpression system, we then found that overexpression of *MazE* can reverse *MazF* lethality only over a short window of time (Figure 2A) [54]. There is a “point of no return” which was further confirmed for conditions that are designed to mimic the physiological one [55]; the *mazEF* module was located in its natural

context on the *E. coli* chromosome as a single copy, and *mazEF* was induced by the introduction of one of eight different stressful conditions. In all studied cases, the induction of *mazEF* causes an irreversible loss of viability ([55]; Figure 2B). Thus, a “point of no return,” the basic functional characteristic of cell death, occurs after induction of *MazF*. That *E. coli mazEF* as well as *relBE* mediate cell death after inducing these modules by stressful conditions (using hydroxyurea) was also shown at the single cell level [56]. These results further support our previous conclusion that *E. coli mazEF* mediates cell death, and it is an active and genetically “programmed” death response. Note that a third gene, *mazG*, whose product, *MazG*, is a pyrophosphate hydrolase of nucleotides, is located in the *mazEF* operon downstream from *mazF* [57]. Deleting *mazG* decreases cell survival during nutritional stress, and it was suggested that *MazG* may be involved in restraining cell-death mechanisms so as to delay the point of no return [58].

### How *MazF* Kills

*MazF* inhibits protein synthesis through its endoribonucleolytic effect on mRNAs [59–62]. *MazF* endoribonuclease preferentially cleaves single-stranded mRNAs at ACA sequences [61,62], also tmRNA [59], the tRNA–mRNA hybrids that bind to the A site of ribosomes containing a truncated mRNA, tagging the corresponding nascent polypeptide chains with a degradation signal, while allowing translation to terminate normally (reviewed in [63]). We suggested that the endoribonucleolytic effect of *MazF* could be one of the initial steps in the programmed cell-death pathway ([2,54,55]). In this model, this initial step can be reversed by the antagonistic effect of *MazE* over *MazF*. Further cleavage of mRNAs and tmRNA by *MazF* would be prevented by *MazE*, and the previously truncated mRNAs could be released from the ribosomes through the action of de novo synthesized uncleaved tmRNA. However, we suggest [32,54,55] that *MazE* cannot reverse the downstream cascade already initiated by *MazF*. Thus, if the process is not stopped in time, eventually cell death would be unavoidable. How might the inhibition of translation by *MazF* induce such a downstream cascade leading to cell death? Currently, two mechanisms that may act simultaneously seem plausible (Figure 1): i) some of the mRNAs cleaved by *MazF* encode proteins required for cell survival; and ii) *MazF*-cleaving mRNAs at specific sites might lead to the selective synthesis of proteins encoded by mRNAs that are resistant to cleavage by *MazF*. We hypothesize that such *MazF*-resistant mRNAs might not contain the *MazF* target site (ACA sequences). Alternatively, they might contain ACA sequences, but could be protected from the action of *MazF* through some other unknown mechanism. Such proteins could be part of a cell-death network; further work is needed to identify possible pathways to cell death.

### *mazEF* Is Widely Distributed among Bacteria

The *mazEF* toxin–antitoxin system was discovered and studied mainly in *E. coli*. However, *mazEF*-like modules occur in the chromosomes of many other bacteria including pathogens [24,26–29]. The degree of similarity of *mazEF*-like products of various bacteria to that of *E. coli* is shown in

**Table 1.** The Distribution of MazE and MazF among Various Bacteria

| Organism Strain                                        | Protein Hits to <i>E. coli</i> K 12 (Sequenced Wild-Type MG1655) | MazE                |                  |                    | MazF             |                  |                    |
|--------------------------------------------------------|------------------------------------------------------------------|---------------------|------------------|--------------------|------------------|------------------|--------------------|
|                                                        |                                                                  | Accession Number    | Percent Identity | Percent Similarity | Accession Number | Percent Identity | Percent Similarity |
| <i>Escherichia coli</i> strain K12-MG1655              | –                                                                | b2783               | 100              | 100                | b2782            | 100              | 100                |
|                                                        |                                                                  | b4224               | 32               | 54                 | b4225            | 35               | 51                 |
| <i>Escherichia coli</i> strain O157:H7 EDL933          | 10,290                                                           | Z4098               | 100              | 100                | Z4097            | 100              | 100                |
|                                                        |                                                                  | Z5835               | 32               | 56                 | Z5836            | 36               | 52                 |
| <i>Salmonella typhimurium</i> LT2 strain SGSC1412      | 8,849                                                            | –                   | ND               | ND                 | –                | ND               | ND                 |
| <i>Pseudomonas aeruginosa</i> strain PAO1              | 7,803                                                            | –                   | ND               | ND                 | –                | ND               | ND                 |
| <i>Agrobacterium tumefaciens</i> strain C58 UWash      | 6,826                                                            | Atu0939             | 30               | 54                 | Atu0940          | 39               | 53                 |
| <i>Bacillus anthracis</i> strain Sterne                | 5,404                                                            | –                   | ND               | ND                 | BAS0240          | 32               | 48                 |
| <i>Bacillus subtilis</i> strain 168                    | 4,735                                                            | –                   | ND               | ND                 | Bsu0466          | 32               | 48                 |
| <i>Bacillus halodurans</i> strain C-125                | 4,489                                                            | BH3720              | 41               | 66                 | BH3721           | 54               | 68                 |
| <i>Listeria monocytogenes</i> strain 4b F2365          | 3,391                                                            | LMOh7858_pLM80_0053 | 27               | 49                 | LMOh7858_0948    | 32               | 48                 |
| <i>Enterococcus faecalis</i> strain V583               | 3,131                                                            | EFA0072             | 35               | 57                 | EFA0071          | 31               | 54                 |
|                                                        |                                                                  | –                   | ND               | ND                 | EF3262           | 36               | 55                 |
|                                                        |                                                                  | –                   | ND               | ND                 | EF0850           | 29               | 52                 |
|                                                        |                                                                  | –                   | ND               | ND                 | EF0826           | 22               | 47                 |
| <i>Clostridium perfringens</i> strain 13               | 2,957                                                            | –                   | ND               | ND                 | CPE0295          | 26               | 50                 |
|                                                        |                                                                  | –                   | ND               | ND                 | PCP58            | 28               | 47                 |
| <i>Staphylococcus aureus</i> strain Mu50               | 2,657                                                            | –                   | ND               | ND                 | SA1873           | 26               | 48                 |
| <i>Deinococcus radiodurans</i> strain R1               | 2,560                                                            | DR0416              | 43               | 63                 | DR0417           | 46               | 61                 |
|                                                        |                                                                  | –                   | ND               | ND                 | DR0662           | 29               | 50                 |
| <i>Mycobacterium tuberculosis</i> strain CDC1551       | 2,461                                                            | –                   | ND               | ND                 | MT2869           | 41               | 54                 |
|                                                        |                                                                  | –                   | ND               | ND                 | MT1992           | 28               | 43                 |
|                                                        |                                                                  | –                   | ND               | ND                 | MT2046           | 36               | 53                 |
| <i>Neisseria meningitidis</i> strain serogroup A Z2491 | 2,191                                                            | –                   | ND               | ND                 | NMA0400          | 39               | 58                 |
| <i>Leptospira interrogans</i> strain serovar lai 56601 | 2,143                                                            | LA1780              | 32               | 53                 | LA1781           | 44               | 66                 |
| <i>Neisseria meningitidis</i> strain MC58              | 2,119                                                            | NMB0914             | 36               | 65                 | NMB0913          | 33               | 52                 |
| –                                                      |                                                                  | –                   | ND               | ND                 | NMB2038          | 34               | 58                 |
| <i>Neisseria gonorrhoeae</i> FA1090 (Oklahoma)         | 1,897                                                            | NGO0517             | 40               | 74                 | NGO0516          | 28               | 49                 |
| <i>Streptococcus mutans</i> strain UA159               | 1,833                                                            | SMU.172             | 31               | 49                 | SMU.173          | 30               | 51                 |
|                                                        |                                                                  | SMU.1768c           | 37               | 56                 | –                | ND               | ND                 |
| <i>Bartonella henselae</i> strain Houston-1            | 1,425                                                            | BH07050             | 26               | 65                 | BH07060          | 32               | 51                 |
| <i>Rickettsia felis</i> strain URRWXCal2               | 1,050                                                            | –                   | ND               | ND                 | RF_1343          | 24               | 46                 |

The presence of *E. coli* K12 MazE and MazF homologous in various bacteria was determined by Blast search (threshold of *p*-value = 1) using the genomic database of TIGR Comprehensive Microbial Resource Web site (<http://cmr.tigr.org/tigr-scripts/CMR/CmrHomePage.cgi>). The bacteria are arranged by the number of protein hits between them and *E. coli* strain K12 MG1655, signifying the homology of the bacteria.

ND, not detected.

DOI: 10.1371/journal.pgen.0020135.t001

Table 1 with special emphasis on pathogens. Several features are obvious: i) there is no correlation between the presence or the absence of a *mazEF*-like module on the chromosome of a given bacterium and the phylogenetic distance of that bacterium from *E. coli*. For example, whereas the *E. coli* close relative *Salmonella typhimurium* bears no genes similar to *E. coli* MazE and/or to MazF, gene modules at least 50% similar to *E. coli* MazE and MazF occur in *Deinococcus radiodurans*, *Leptospira interrogans*, *Neisseria meningitidis*, and *Streptococcus mutans*, all of which are phylogenetically remote from *E. coli*. In *S. mutans*, the *mazEF* module is functional and has a physiological role [64]; ii) sometimes, though, there may be a gene whose product is highly similar to *E. coli* MazF, the product of the upstream gene is barely similar to the antitoxin MazE. Of course a protein that differs from the *E. coli* antitoxin MazE might still act as an antitoxin of a *mazF*-like product. For example, *B. subtilis* has a module called *ydcDE*, of which the toxic product YdcE, called Endo A, is

highly similar to *E. coli* MazF in sequence and structure [65]. Endo A also has an endoribonucleolytic activity, similar to that of MazF, which is inhibited by YdcD. Thus, the antitoxin for Endo A is YdcD, even though it is barely similar to *E. coli* MazE; iii) the chromosomes of some of bacteria bear more than one *mazEF*-like module.

*Mycobacterium tuberculosis* is a devastating pathogen in which there may be functional MazF homologs [66]. The chromosome of *M. tuberculosis* bears at least seven genes encoding MazF-like products (MazF-mt1 to MazF-mt7), some of which (including MazF-mt1) cause cell death when ectopically expressed in *E. coli*. Purified MazF-mt1 is an endoribonuclease with specificity like that of *E. coli* MazF [66]. Are these genes expressed and functional in *M. tuberculosis*, or are they only cryptic remainders of some evolutionary process? This question is particularly important because *M. tuberculosis* chromosome bears no *mazE*-like gene upstream of the *mazF*-like genes.

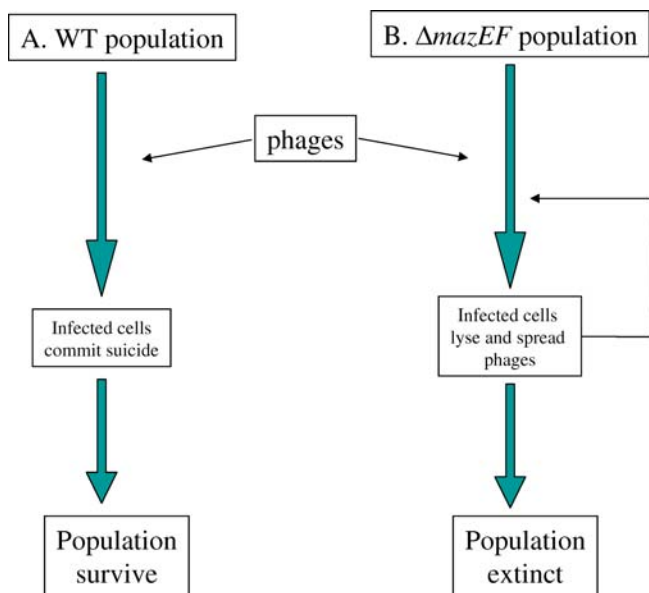

DOI: 10.1371/journal.pgen.0020135.g003

**Figure 3.** A Model: How Programmed Cell Death Saves a Bacterial Population from Annihilation by Phage P1 Infection

(A) In wild-type cells, P1 infection triggers the action of *mazEF* which mediates the death of the infected cells. Because infected cells die before phage can propagate, few phages are released, the titer of the phages is low, and the population survives.

(B) In  $\Delta mazEF$  cells, nothing interferes with the phage infections: the infected cells lyse, allowing many released particles to spread to the rest of the population. Thus infection by P1 of a  $\Delta mazEF$  population leads to the death of more cells. Though infection by P1 of wild-type populations leads to the loss of some of the cells, more members of the population survive.

### Cell Death as a Defense against the Spread of Phage Infection and Other Functions

The presence of *mazEF*-like modules in the chromosomes of many bacteria suggests that cell death plays roles in bacterial physiology and/or evolution [28,32]. PCD is clearly counterproductive for an individual bacterium; however, it might be advantageous for a whole cell population. For example, *mazEF*-mediated death can act as a defense mechanism that prevents the spread of phages ([67] and Figure 3). P1 phages exist in two forms: i) virulent particles that are developed in the host cells (*E. coli*) and are released by cell lysis; and ii) as lysogenic prophages that replicate like plasmids using their autonomous origin of replication. Such phages carry a gene coding for a repressor that permits them to replicate in the host cells without entering the lytic phase. Should the repressor become inactivated, prophages enter the lytic stage. Bacterial cells carrying prophages are called lysogens (reviewed in [68]). When  $\Delta mazEF$  P1 lysogens are heat-induced, inactivating a temperature-sensitive repressor, most of the cells lyse, whereas only a small fraction of heat-induced wild-type P1 lysogens lyse [67]. Moreover, the  $\Delta mazEF$  lysogens produce significantly more phages than do the wild-type lysogens. Surprisingly, despite the differences in the level of lysis and phage production, neither wild-type nor  $\Delta mazEF$  cells produce colonies after phage induction. A similar pattern is observed when a virulent phage P1 (which can run only the lytic program) is used to infect  $\Delta mazEF$  or wild-type cells [67]. Why then do neither wild-type nor  $\Delta mazEF$  cells

produce colonies after infection? The  $\Delta mazEF$  cells produce no colonies because they are all lysed by the phages. Wild-type cells probably produce no phages because the cells have already been killed by the lethal action of the *mazEF* module. Thus, the *mazEF* module keeps the infection from spreading, thereby protecting the wild-type population from total collapse. The death of individual cells caused by the action of *mazEF* appears to prevent the spread of infective P1 phages. The action of *mazEF* may have a general protective role for the population against a spread of phages [67]. This model, reminiscent of the antiviral response by apoptosis in eukaryotes [69–71], suggests that bacterial populations may share some characteristics of multicellular organisms (discussed below).

Bacterial cell death mediated by *mazEF* may have several other roles [28,32]; the *mazEF* system might act as a guardian of the bacterial chromosome. When, for example, DNA repair systems fail to overcome excessive damage to the chromosome, *mazEF*-mediated cell death might be activated. Thus, by eliminating cells that carry genomic defects and mutations, the *mazEF* system might contribute to the maintenance of genomic stability of the whole population. This potential role for *mazEF* as “guardian of the chromosome” suggests that the presence of *mazEF* on the bacterial chromosome is advantageous to the population because it maintains the continuity of the bacterial population.

Cell death mediated by *mazEF* may also be important in the response of bacteria to severe nutritional stress. When food is scarce, the death of part of the bacterial population may provide nutrients for the surviving cells [13]. This occurs during *B. subtilis* sporulation, upon the activation of a novel PCD system unlike *mazEF* or other known toxin–antitoxin systems (see below).

### The *B. subtilis* *skf* and *sdp* Operons Promote Cell Death of a Subpopulation of Sporulating Cells

Nutrient limitation triggers spore formation in *B. subtilis*, which is governed by the regulatory protein Spo0A [72]. At the inception of sporulation, Spo0A strongly upregulates two operons: *skfA-H* (sporulating killing factor) and *sdpABC* (sporulating delay protein) [73]. Losick and colleagues [21] found that during sporulation the *skf* operon directs the production of an extracellular killing factor (Figure 4). The products of *skfE* and *skfF* confer resistance to the killing factor or toxin. Because SkfE resembles an ATP-binding cassette and SkfF resembles a transport complex (ABC transporter), they might work together as an export pump, exporting the toxin. Produced from the second operon *sdpABC*, SdpC is a 5kDa extracellular factor that acts as an intercellular signaling protein. SdpC strongly upregulates transcription of a two-gene operon, *sdpRI* [74] (previously termed *yobA* and *yvaZ*, respectively [21]), located immediately downstream from, and in convergent orientation to, the *sdpABC* operon.

Losick and colleagues [21] propose an intriguing model in which a PCD pathway enables a *Bacillus* population to delay sporulation ([21,75]; Figure 4). When nutrients are limited, Spo0A, the key regulatory protein, is activated only in part of the population (the subpopulation of Spo0A-ON cells); in the rest of the cell population, Spo0A remains inactive (the subpopulation of Spo0A-OFF cells). So, according to their

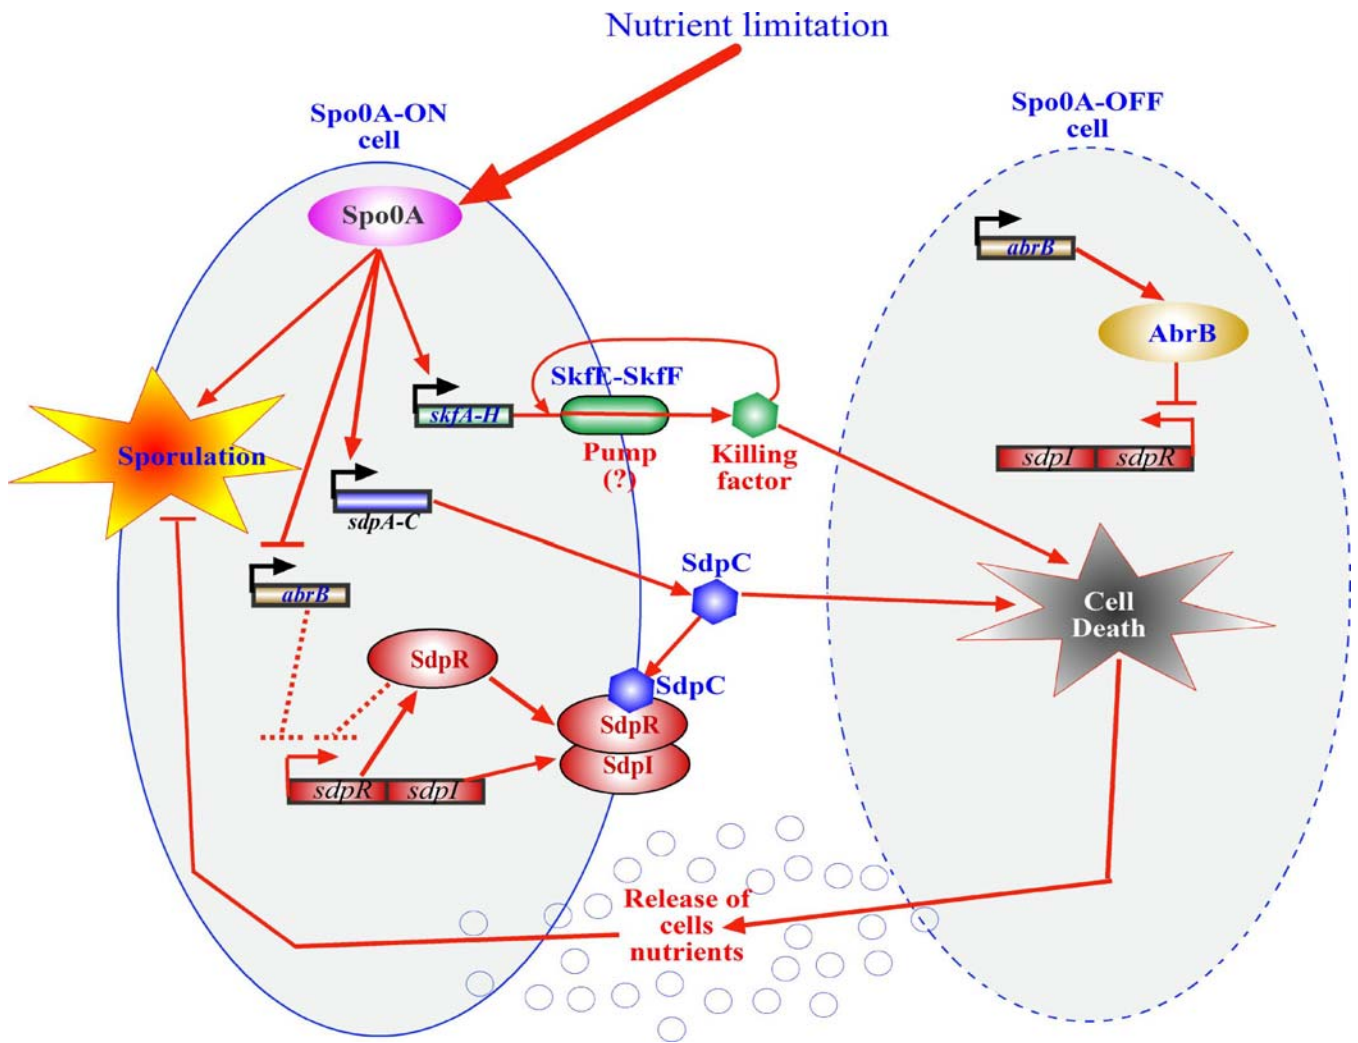

DOI: 10.1371/journal.pgen.0020135.g004

**Figure 4.** A Model of Delaying Sporulation by Cell Death

Nutrient limitation activates Spo0A in a subpopulation (Spo0A-ON cells) of the culture of *B. subtilis*. Spo0A activates the sporulation process, but can delay sporulation by activating two operons, *skfA-H* and *sdpABC*. *skf* is involved in the production of an extracellular killing factor. SkfE and SkfF, which are produced in Spo0A-ON cells, antagonize the lethal action of the killing factor, probably by acting as an export pump that secretes the factor from the cells. *sdpC* encodes for another killing factor. Two mechanisms are responsible for the resistance of the Spo0A-ON cells to SdpC: i) the three-protein-signaling pathway (SdpC–SdpI–SdpR) (see text); and ii) repression of AbrB synthesis by Spo0A (see text). In Spo0A-OFF cells, the *sdpRI* operon is repressed by AbrB, leading to sensitivity to SdpC toxin. As a whole, Spo0A-OFF cells are killed and lysed, releasing nutrients to be consumed by the Spo0A-ON cells. Thereby, the process of sporulation of the Spo0A-ON cells can be postponed, a potential benefit should food become available [21,74].

model [21], when death by starvation is imminent for the whole population, the following regulatory cascade takes place (Figure 4): i) in Spo0A-ON cells, the *skf* operon is induced, and as a consequence, the cells produce the killing factor mediated by *skf* and the pump (SkfE and SkfF) that exports it, thereby protecting the Spo0A-ON cells from being killed. Because the Spo0A-OFF cells produce neither the killing factor nor the pump, they are killed by the extracellular factor; ii) moreover, in Spo0A-ON cells, the *sdpABC* operon is also induced, leading to the production of SdpC, the toxic signal protein. Cells are self-resistant to SdpC toxin because the *sdpRI* operon, located adjacent and in a convergent orientation to *sdpC* (Figure 4), encodes immunity functions that protect the Spo0A-ON cells from the toxic effect of SdpC [74]. The immunity protein SdpI is a putative polytopic membrane protein, and SdpR is an autorepressor

that allows only basal expression of the *sdpRI* immunity operon. SdpI is also a signal transduction protein that responds to SdpC by sequestering the SdpR autorepressor at the membrane. Thus SdpC is both a toxin and a ligand; SdpI is both an immunity protein and a receptor/signal transduction protein. Furthermore, in addition to this three-protein intercellular signaling pathway (SdpC–SdpI–SdpR), another control mechanism participates. The repressor AbrB blocks even basal expression of the immunity operon *sdpIR* in Spo0A-OFF cells when these cells are challenged with SdpC toxin/ligand. Conversely, in Spo0A-ON cells, Spo0A represses the gene for AbrB, thereby releasing the *sdpRI* operon from repression [76]. Thus, the immunity operon turns on when the toxin/ligand SdpC is present and the repressor AbrB is absent (Figure 4).

In summary, a cellular differentiation occurs in which

Spo0A-ON cells live and Spo0A-OFF cells die due to SdpC protein and the as-yet-unidentified killing factor which causes cell lysis. Their death releases nutrients that are then used by Spo0A-ON cells. Using this “emergency food source,” Spo0A-ON cells can continue growing rather than completing the morphogenic process of spore formation.

As Losick and colleagues suggest [21], such differentiation might be useful for bacterial cell populations, because sporulation is an energy-intensive process that becomes irreversible after its earlier stages. If, during this period, food resources were to become available, sporulating cells would be at a disadvantage compared with cells able to start growing immediately. Thus, for the bacterial population as a whole, delaying the onset of sporulation could be beneficial.

## Conclusions, Questions, and Other “Multicellular” Behaviors

Two different genetic programs were described that promote PCD in bacteria: i) the *E. coli* toxin–antitoxin module *mazEF*; and ii) the *skf* and *sdp* operons of *B. subtilis* that mediates the death of some sporulating bacterial cells. In both cases, many intriguing unanswered questions remain. In the case of *E. coli mazEF*: what elements are involved in the death pathway(s)? Do other chromosomally borne toxin–antitoxin systems also participate in such a death process? Do *mazEF*-like systems (Table 1) mediate cell death in the other bacteria? Does *mazEF* mediate cell death in the most devastating pathogens such as *M. tuberculosis*, *S. aureus*, and *B. anthracis* [27,29] and Table 1), and could this death be part of their pathogenicity? The products of *mazEF* [28] and of other bacterial toxin–antitoxin systems [29] might be potential targets for new antibiotics. In particular, it might be possible to design specific antibiotics, the design of which might be greatly facilitated by the already determined crystal structures of MazE [77,78], MazE–MazF [40], and RelB–RelE [79].

The PCD response in *B. subtilis*, which is mediated by *skf* and *sdp* operons, has been studied genetically and physiologically [21,74]. We expect that future studies will reveal information on specific unanswered questions such as, is the killing factor actually a product of the *skf* operon, or is it only mediated by it? Do SkfE and SkfF produce a pump? How does SdpC kill the cells? Is the protein-signaling pathway (SdpC–SdpI–SdpR) sufficient for the immunity response?

Bacterial PCD is a very basic, and at first glance, counterintuitive, phenomenon, making its recent discovery exciting. Future studies of PCD in bacteria will be important for revealing the death pathways involved, and for answering the questions above. The existence of bacterial PCD suggests an important conceptual change in our understanding of bacteria. Growing experimental evidence suggests that bacteria seldom behave as individual organisms. As populations, they manifest “multicellular-like” behaviors, of which PCD may be one. Interesting examples include the ability of bacteria to communicate with each other via quorum-sensing signal molecules [80–90], an important theme in current microbiology. Some basic characteristics of the apparent multicellularity of bacterial populations include differentiation [91–94], intercellular communication [80–90], and PCD [14]. Both the chromosomal toxin–antitoxin PCD systems and the killing response of *B. subtilis* during

sporulation are examples of multicellular behaviors under stressful conditions. When challenged, the bacterial population seems to act like a multicellular organism in which a subpopulation dies, thereby permitting the survival of the bacterial population as a whole. Regarding the role of bacterial PCD in multicellular phenotypes, a main question to be answered is whether, as in *B. subtilis*, cell–cell signaling is involved in *E. coli mazEF*-mediated cell death. ■

## Acknowledgments

We thank F. R. Warshaw-Dadon (Jerusalem, Israel) for her critical reading of the manuscript.

**Author contributions.** SA, IKG, and RH conceived, designed, and performed the experiments. RH designed the drawings. HEK wrote the paper.

**Funding.** We thank the Israel Science Foundation administrated by the Israel Academy of Science and Humanities (grant 938/04) for financial support.

**Competing interests.** The authors have declared that no competing interests exist.

## References

- Kerr JFR, Wyllie AH, Curie AR (1972) Apoptosis: A basic biological phenomenon with wide-ranging implication in tissue kinetics. *Br J Cancer* 26: 239–257.
- Raff M (1998) Cell suicide for beginners. *Nature* 396: 119–122.
- Hengartner MO (2000) The biochemistry of apoptosis. *Nature* 407: 770–776.
- Daniel NN, Korsmeyer SJ (2004) Cell death critical control points. *Cell* 116: 205–219.
- Vanvushin BF, Bakeeva LE, ZamayatninaVA, Aleksandrushkina NI (2004) Apoptosis in plant: Specific features of plan apoptotic cells and effect of various factors and agents. *Int Rev Cytol* 233: 135–179.
- Szabo C (2005) Mechanisms of cell necrosis. *Crit Care Med* 33: S530–S534.
- Gozuacik D, Kimchi A (2004) Autophagy as a cell death and tumor suppressor mechanism. *Oncogene* 23: 2891–2906.
- Levine B, Yuan J (2005) Autophagy in cell death: An innocent convict? *J Clin Invest* 115: 2679–2688.
- Ameisen JC (1996) The origin of programmed cell death. *Science* 272: 1278–1279.
- Ameisen JC (2004) Looking for death at the core of life in the light of evolution. *Cell Death Differ* 11: 4–10.
- Lee N, Bertholet S, Debrabant A, Muller J, Duncan R, et al. (2002) Programmed cell death in the unicellular protozoa parasite *Leishmania*. *Cell Death Differ* 9: 53–64.
- Debrabant A, Lee N, Bertholet S, Duncan R, Nakhasi HL (2003) Programmed cell death in trypanosomatid and other unicellular organisms. *Int J Parasitol* 33: 257–267.
- Aizenman E, Engelberg-Kulka H, Glaser G (1996) An *Escherichia coli* chromosomal “addiction module” regulated by guanosine-3′5′-bispyrophosphate: A model for programmed bacterial cell death. *Proc Natl Acad Sci U S A* 93: 6059–6063.
- Engelberg-Kulka H, Glaser G (1999) Addiction modules and programmed cell death and anti-death in bacterial cultures. *Annu Rev Microbiol* 53: 43–70.
- de la Cueva-Mendez G (2003) Distressing bacteria: Structure of a prokaryotic detox program. *Mol Cell* 11: 848–850.
- Hayes F (2003) Toxins–antitoxins: Plasmid maintenance, programmed cell death, and cell cycle arrest. *Science* 301: 1496–1499.
- Hochman A (1997) Programmed cell death in prokaryotes. *Crit Rev Microbiol* 23: 207–214.
- Lewis K (2000) Programmed cell death in bacteria. *Microbiol Mol Biol Rev* 64: 503–514.
- Rice KC, Bayle KW (2003) Death toolbox: Examining the molecular components of bacterial programmed cell death. *Mol Microbiol* 50: 729–738.
- Yarmolinsky MB (1995) Programmed cell death in bacterial population. *Science* 267: 836–837.
- Gonzalez-Pastor JE, Hobbs EC, Losick R (2003) Cannibalism by sporulating bacteria. *Science* 301: 510–513.
- Jensen RB, Gerdes K (1995) Programmed cell death in bacteria: Proteic plasmid stabilization systems. *Mol Microbiol* 17: 205–210.
- Couturier M, Bahassi EM, Van Melder L (1998) Bacterial death by DNA gyrase poisoning. *Trends Microbiol* 6: 269–275.
- Gerdes K, Christensen SK, Lobner-Olesen A (2005) Prokaryotic toxin–antitoxin stress response loci. *Nature Rev Microbiol* 3: 371–382.
- Buts B, Lah J, Dao-Thi MH, Wyns L, Loris R (2006) Toxin–antitoxin

- modules as bacterial metabolic stress managers. *Trends Biochem Sci* 30: 673–679.
26. Mittenhuber G (1999) Occurrence of MazEF-like antitoxin/toxin systems in bacteria. *J Mol Microbiol Biotechnol* 1: 295–302.
  27. Engelberg-Kulka H, Sat B, Hazan R (2002) Bacterial programmed cell death and antibiotics. *ASM News* 67: 617–625.
  28. Engelberg-Kulka H, Reches M, Sat B, Amitai S, Hazan R (2004) Bacterial programmed cell death as a target for antibiotics. *Trends Microbiol* 12: 66–71.
  29. Pandey DP, Gerdes K (2005) Toxin–antitoxin loci are highly abundant in free-living but lost from host-associated prokaryotes. *Nucleic Acids Res* 33: 966–976.
  30. Metzger S, Dror IB, Aizenman E, Schreiber G, Toone M, et al. (1988) The nucleotide sequence and characterization of the *relA* gene of *Escherichia coli*. *J Biol Chem* 263: 15699–15704.
  31. Masuda Y, Miyakawa K, Nishimura Y, Ohtsubo E (1993) *chpA* and *chpB*, *Escherichia coli* chromosomal homologs of the *pem* locus responsible for stable maintenance of plasmid R100. *J Bacteriol* 175: 6850–6856.
  32. Engelberg-Kulka, Hazan R, Amitai S (2005) *mazEF*: A chromosomal toxin–antitoxin module that triggers programmed cell death in bacteria. *J Cell Science* 118: 4327–4332.
  33. Masuda Y, Ohtsubo E (1994) Mapping and disruption of the *chpB* locus in *Escherichia coli*. *J Bacteriol* 176: 5861–5863.
  34. Bech F, Jorgensen WST, Diderichsen B, Karlstrom OH (1985) Sequence of the *relB* transcription unit from *Escherichia coli* and identification of the *relB* gene. *EMBO J* 4: 1059–1066.
  35. Gottfredsen M, Gerdes K (1998) The *Escherichia coli relBE* genes belong to a new toxin–antitoxin gene family. *Mol Microbiol* 29: 1065–1076.
  36. Christensen SK, Mikkelsen M, Pedersen K, Gerdes K (2001) RelE, a global inhibitor of translation, is activated during nutritional stress. *Proc Natl Acad Sci U S A* 98: 14328–14333.
  37. Grady R, Hayes F (2003) Axe-Txe, a broad-spectrum proteic toxin–antitoxin system specified by a multidrug-resistant clinical isolate of *Enterococcus faecium*. *Mol Microbiol* 47: 1419–1432.
  38. Cherny I, Gazit E (2004) The YefM antitoxin defines a family of natively unfolded proteins: Implications as a novel antibacterial target. *J Biol Chem* 279: 8252–8261.
  39. Christensen SK, Maenhaut-Michel G, Mine N, Gottesman S, Gerdes K, et al. (2004) Overproduction of the lon protease triggers inhibition of translation in *Escherichia coli*: Involvement of the *yefM-yoeB* toxin–antitoxin system. *Mol Microbiol* 51: 1705–1717.
  40. Kamada K, Hanaoka F, Burley SK (2003) Crystal structure of the MazE/MazF complex: Molecular bases of antidote–toxin recognition. *Mol Cell* 11: 875–884.
  41. Marianovsky I, Aizenman E, Engelberg-Kulka H, Glaser G (2001) The regulation of the *Escherichia coli mazEF* promoter involves an unusual alternating palindrome. *J Biol Chem* 278: 5975–5984.
  42. Engelberg-Kulka H, Reches M, Narasimhan S, Schouler-Schwarz R, Klemes Y, et al. (1998) *rexB* bacteriophage  $\lambda$  is an anti cell death gene. *Proc Natl Acad Sci U S A* 95: 15481–15486.
  43. Sat B, Hazan R, Fisher T, Khaner H, Glaser G, et al. (2001) Programmed cell death in *Escherichia coli*: Some antibiotics can trigger the *MazEF* lethality. *J Bacteriol* 183: 2041–2045.
  44. Hazan R, Sat B, Reches M, Engelberg-Kulka H (2001) The post-segregational killing mediated by the phage P1 “addiction module”: *phd-doc* requires the *Escherichia coli* programmed cell death system *mazEF*. *J Bacteriol* 183: 2046–2050.
  45. Sat B, Reches M, Engelberg-Kulka H (2003) The *Escherichia coli* chromosomal “suicide module” *mazEF* is involved in thymine-less death. *J Bacteriol* 185: 1803–1807.
  46. Hazan R, Sat B, Engelberg-Kulka H (2004) *Escherichia coli mazEF*-mediated cell death is triggered by various stressful conditions. *J Bacteriol* 186: 3663–3669.
  47. Rouviere PE, De Las Penas A, Mecas J, Lu CZ, Rudd KE, et al. (1995) *rpoE*, the gene encoding the second heat-shock sigma factor, sigma E, in *Escherichia coli*. *EMBO J* 14: 1032–1042.
  48. Ahmad SI, Kirk SH, Eisenstark A (1998) Thymine metabolism and thymineless death in prokaryotes and eukaryotes. *Annu Rev Microbiol* 52: 591–625.
  49. Davies J, Webb V (1998) Antibiotics resistance in bacteria. In: Krause RM, editor. *Emerging infections*. New York: Academic Press. pp. 239–273.
  50. Storz G, Zheng M (2000) Oxidative stress. In: Storz G, Hengge-Aronis R, editors. *Bacterial stress response*. Washington (D.C.): Academic Press. pp. 47–59.
  51. Cohen SS, Barner HD (1954) Studies on the unbalanced growth in *Escherichia coli*. *Proc Natl Acad Sci U S A* 40: 885–893.
  52. Nakayama K, Kusano K, Irino N, Nakayama H (1994) Thymine starvation-induced structural changes in *Escherichia coli* DNA. Detection by pulsed field gel electrophoresis and evidence for involvement of homologous recombination. *J Mol Biol* 243: 611–620.
  53. Pedersen K, Christensen SK, Gerdes K (2002) Rapid induction and reversal of bacteriostatic conditions by controlled expression of toxins and antitoxins. *Mol Microbiol* 45: 501–510.
  54. Amitai S, Yassin Y, Engelberg-Kulka H (2004) MazF-mediated cell death in *Escherichia coli*: A point of no return. *J Bacteriol* 186: 8295–8300.
  55. Kolodkin-Gal I, Engelberg-Kulka H (2006) Induction of *Escherichia coli* chromosomal *mazEF* by stressful conditions causes an irreversible loss of viability. *J Bacteriol* 188: 3420–3423.
  56. Godoy VG, Jarosz DF, Walker FL, Simmons LA, Walker G (2006) Y-family DNA polymerases respond to DNA damage-independent inhibition of replication fork progression. *EMBO* 25: 868–879.
  57. Zhang J, Inouye M (2002) MazG, a nucleoside triphosphate pyrophosphohydrolase, interacts with Era, an essential GTPase in *Escherichia coli*. *J Bacteriol* 184: 5323–5329.
  58. Gross M, Marianovsky I, Glaser G (2006) MazG—A regulator of programmed cell death in *Escherichia coli*. *Mol Microbiol* 59: 590–601.
  59. Christensen SK, Pedersen K, Hensen FG, Gerdes K (2003) Toxin–antitoxin loci as stress-response elements: ChpAK/MazF and ChpBK cleave translated mRNAs and are counteracted by tmRNA. *J Mol Biol* 332: 809–819.
  60. Muñoz-Gomez AG, Santos-Sierra S, Berzal-Herranz A, Lemmoner M, Diaz-Orejas R (2004) Insight into the specificity of RNA cleavage by the *Escherichia coli* MazF toxin. *FEBS Lett* 567: 316–320.
  61. Zhang Y, Zhang J, Hoeflich KP, Ikura M, Quing G, et al. (2003) MazF cleaves cellular mRNA specifically at ACA to block protein synthesis in *Escherichia coli*. *Mol Cell* 12: 913–923.
  62. Zhang Y, Zhang J, Hara H, Kato I, Inouye M (2004). Insight into mRNA cleavage mechanism by MazF, an mRNA interferase. *J Biol Chem* 280: 3143–3150.
  63. Karzai AW, Roch ED, Sauer RT (2000) The SsrA-Smp system for protein tagging, directed degradation and ribosome rescue. *Nat Struct Biol* 7: 449–455.
  64. Lemos JAC, Brown TA Jr, Abranches J, Burne RA (2005) Characteristics of *Streptococcus mutans* strains lacking MazEF and RelBE toxin–antitoxin modules. *FEMS Microbiol Lett* 253: 250–257.
  65. Pellgrini O, Mathy N, Gogos A, Shapiro N, Condon C (2005) The *Bacillus subtilis ydcDE* operon encodes an endoribonuclease of MazF/PemK family and its inhibitor. *Mol Microbiol* 56: 1139–1148.
  66. Zhu L, Zhang Y, Teh J-S, Zhang J, Connel N, et al. (2006) Characterization of mRNA interferases from *Mycobacterium tuberculosis*. *J Biol Chem* 281: 18638–18648.
  67. Hazan R, Engelberg-Kulka H (2004) *Escherichia coli mazEF* mediated cell death as a defense mechanism that prevents spreading of phage P1. *Mol Gen Genomics* 272: 227–234.
  68. Hayes W (1964) Temperate bacteriophages and lysogeny: The genetics of bacteria and their viruses. Oxford: Blackwell Scientific. pp. 392–417.
  69. Everett H, McFadden G (1999) Apoptosis: An innate immune response to virus infection. *Trends Microbiol* 7: 160–165.
  70. Barber GN (2001) Host defense, viruses and apoptosis. *Cell Death Differ* 8: 113–126.
  71. Clarke TE, Clem RJ (2003) Insect defense against virus infection: The role of apoptosis. *Int Rev Immunol* 22: 401–424.
  72. Burbulys D, Trach KA, Hoch JA (1991) Initiation of sporulation in *B. subtilis* is controlled by a multicomponent phosphorelay. *Cell* 64: 545–552.
  73. Fawcett P, Eichenberger P, Losick R, Youngman P (2000) The transcriptional profile of early to middle sporulation in *Bacillus subtilis*. *Proc Natl Acad Sci U S A* 97: 8063–8068.
  74. Ellermeier CD, Hobbs EC, Gonzales-Pastor JE, Losick R (2006) A three-protein signaling pathway governing immunity to a bacterial cannibalism toxin. *Cell* 124: 549–559.
  75. Engelberg-Kulka H, Hazan R (2003) Perspective. Cannibals defy starvation and avoid sporulation. *Science* 301: 467–468.
  76. Fujita M, Losick R (2002) An investigation into the compartmentalization of the sporulation transcription factor sigmaE in *Bacillus subtilis*. *Mol Microbiol* 43: 27–38.
  77. Lah J, Marianovsky I, Engelberg-Kulka H, Glaser G, Loris R (2003) Interaction of the addiction antidote MazE with dromedary single domain antibody fragment: Structure, thermodynamics of binding, stability and influence of DNA recognition. *J Biol Chem* 278: 14101–14111.
  78. Loris R, Marianovsky I, Lah J, Laermans T, Engelberg-Kulka H, et al. (2003) Crystal structure of the intrinsically flexible addiction antidote MazE. *J Biol Chem* 278: 28252–28257.
  79. Takagi H, Kakjuta Y, Okada T, Yao M, Tanaka I, et al. (2005) Crystal structure of archaeal toxin–antitoxin RelE-RelB complex with implications for toxin activity and antitoxin effects. *Nat Struct Mol Biol* 12: 327–331.
  80. Kaiser D, Losick R (1993) How and why bacteria talk to each other. *Cell* 73: 873–885.
  81. Swift S, Throup JP, Williams P, Salmund GP, Stewart GS (1996) Quorum sensing: A population-density component in the determination of bacterial phenotype. *Trends Biochem Sci* 21: 214–219.
  82. Dworkin M, Shapiro J, editors (1997) *Bacteria as multi-cellular organisms*. New York: Oxford University Press. 480 p.
  83. Gray KM (1997) Intercellular communication and group behavior in bacteria. *Trends Microbiol* 5: 184–188.
  84. Fuqua C, Greenberg EP (1998) Cell-to-cell communication in *Escherichia coli* and *Salmonella typhimurium*: They may be talking, but who’s listening? *Proc Natl Acad Sci U S A* 95: 6571–6572.
  85. Shapiro JA (1998) Thinking about bacterial populations as multi-cellular organisms. *Annu Rev Microbiol* 52: 81–104.
  86. Lyon GJ, Novick RP (2004) Peptide signaling in *Staphylococcus aureus* and other gram-positive bacteria. *Peptides* 25: 1389–1403.



87. Miller MB, Bassler BL (2001) Quorum sensing in bacteria. *Annu Rev Microbiol* 55: 165–199.
88. Henke JM, Bassler BL (2004) Bacterial social engagements. *Trends Cell Biol* 14: 648–656.
89. Waters M, Bassler BL (2005) Quorum sensing: Cell to cell communication in bacteria. *Annu Rev Cell Dev Biol* 21: 319–346.
90. Camilli A, Bassler BL (2006) Bacterial small-molecule signaling pathways. *Science* 311: 1113–1116.
91. Webb JS, Givskov M, Kjelleberg S (2003) Bacterial biofilms: Prokaryotic adventures in multicellularith. *Curr Opin Microbiol* 6: 578–585.
92. Molofsky AB, Swanson MS (2004) Differentiate to thrive: Lessons from the *Legionella pneumophila* life-cycle. *Mol Microbiol* 53: 29–40.
93. Barak I, Wilkinson AJ (2005) Where asymmetry in gene expression originates. *Mol Microbiol* 57: 611–620.
94. Rather PN (2005) Swarmer cell differentiation in *Proteus mirabilis*. *Environ Microbiol* 7: 1065–1073.

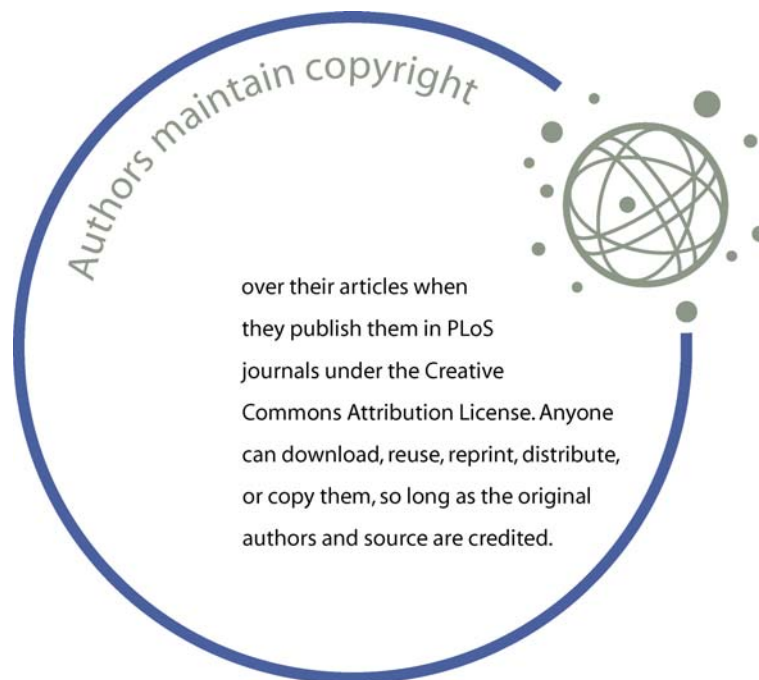

Source: http://oadoi.org/10.1371/journal.pgen.0020135
